# Supplementary material for: Peripheral Blood Mononuclear Cells HIV DNA Levels Impact Intermittently on Neurocognition
Source: PubMed Central journal article supplement (PMC4390276; doi:10.1371/journal.pone.0120488), 2015-04-08

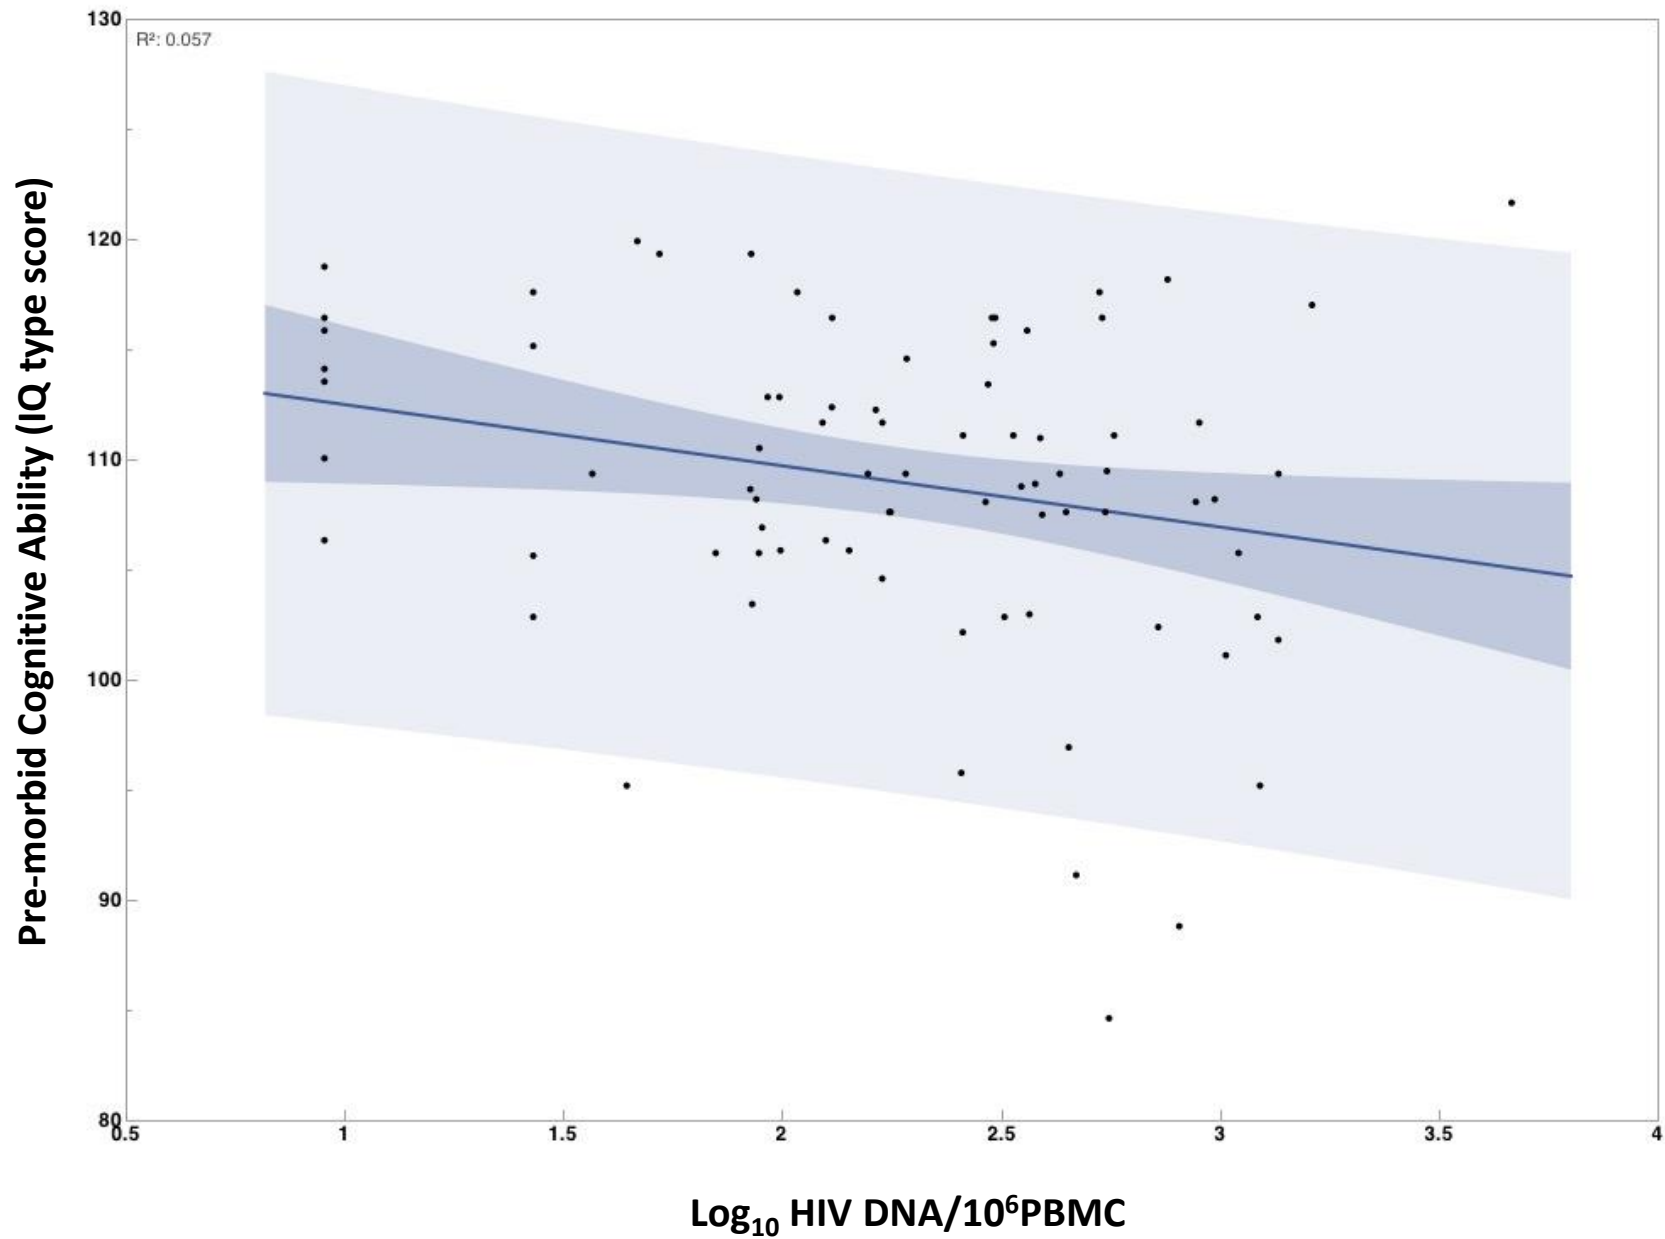

Supplement: pone.0120488.s001.pdf [file pone.0120488.s001.pdf]
