# Supplementary material for: Peripheral Blood Mononuclear Cells HIV DNA Levels Impact Intermittently on Neurocognition
Source: PubMed Central journal article supplement (PMC4390276; doi:10.1371/journal.pone.0120488), 2015-04-08
Supplement: pone.0120488.s005.pdf [file pone.0120488.s005.pdf]

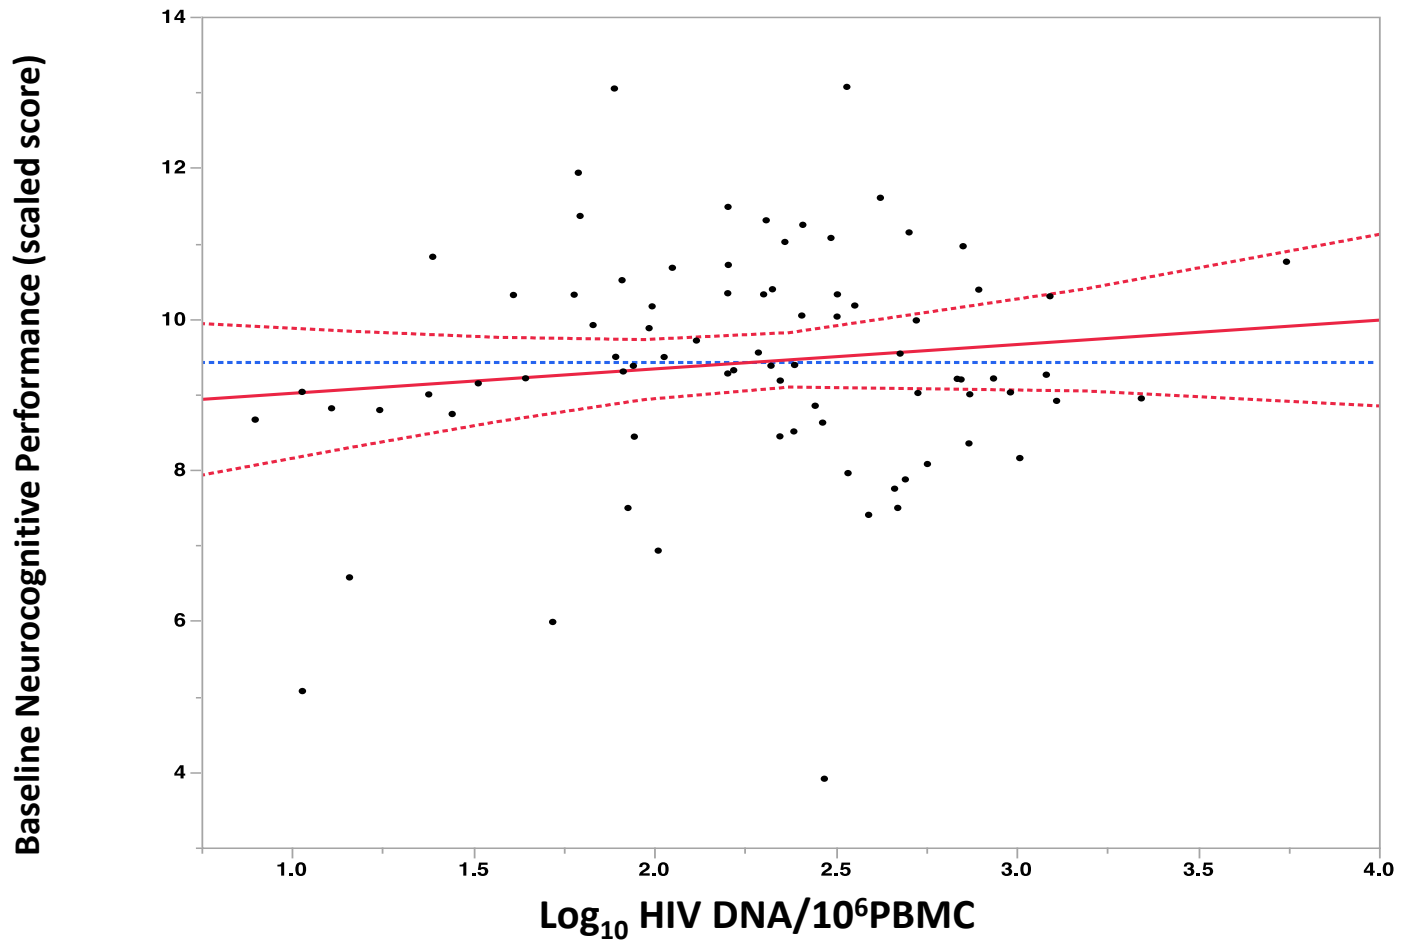

**Sorted Parameter Estimates**

| Term                                  | Estimate  | Std Error | t Ratio | Prob> t |
|---------------------------------------|-----------|-----------|---------|---------|
| Pre-Morbid Ability                    | 0.1032606 | 0.026281  | 3.93    | 0.0002* |
| Age                                   | -0.087482 | 0.025118  | -3.48   | 0.0008* |
| Baseline log10 HIV DNA/10^6 PBMC      | 0.3228454 | 0.311524  | 1.04    | 0.3035  |
| ART During HIV infection 1st year[no] | -0.156667 | 0.2323    | -0.67   | 0.5022  |
| Baseline cART duration (months)       | 0.0032084 | 0.005616  | 0.57    | 0.5696  |
| Baseline CD4-T cells count            | -0.000355 | 0.000679  | -0.52   | 0.6024  |

- - - - 95% Confidence of interval  
 ——— Regression mean fit  
 - - - - set at the mean of Y Leverage Residuals
