# Supplementary material for: Peripheral Blood Mononuclear Cells HIV DNA Levels Impact Intermittently on Neurocognition
Source: PubMed Central journal article supplement (PMC4390276; doi:10.1371/journal.pone.0120488), 2015-04-08
Supplement: pone.0120488.s007.pdf [file pone.0120488.s007.pdf]

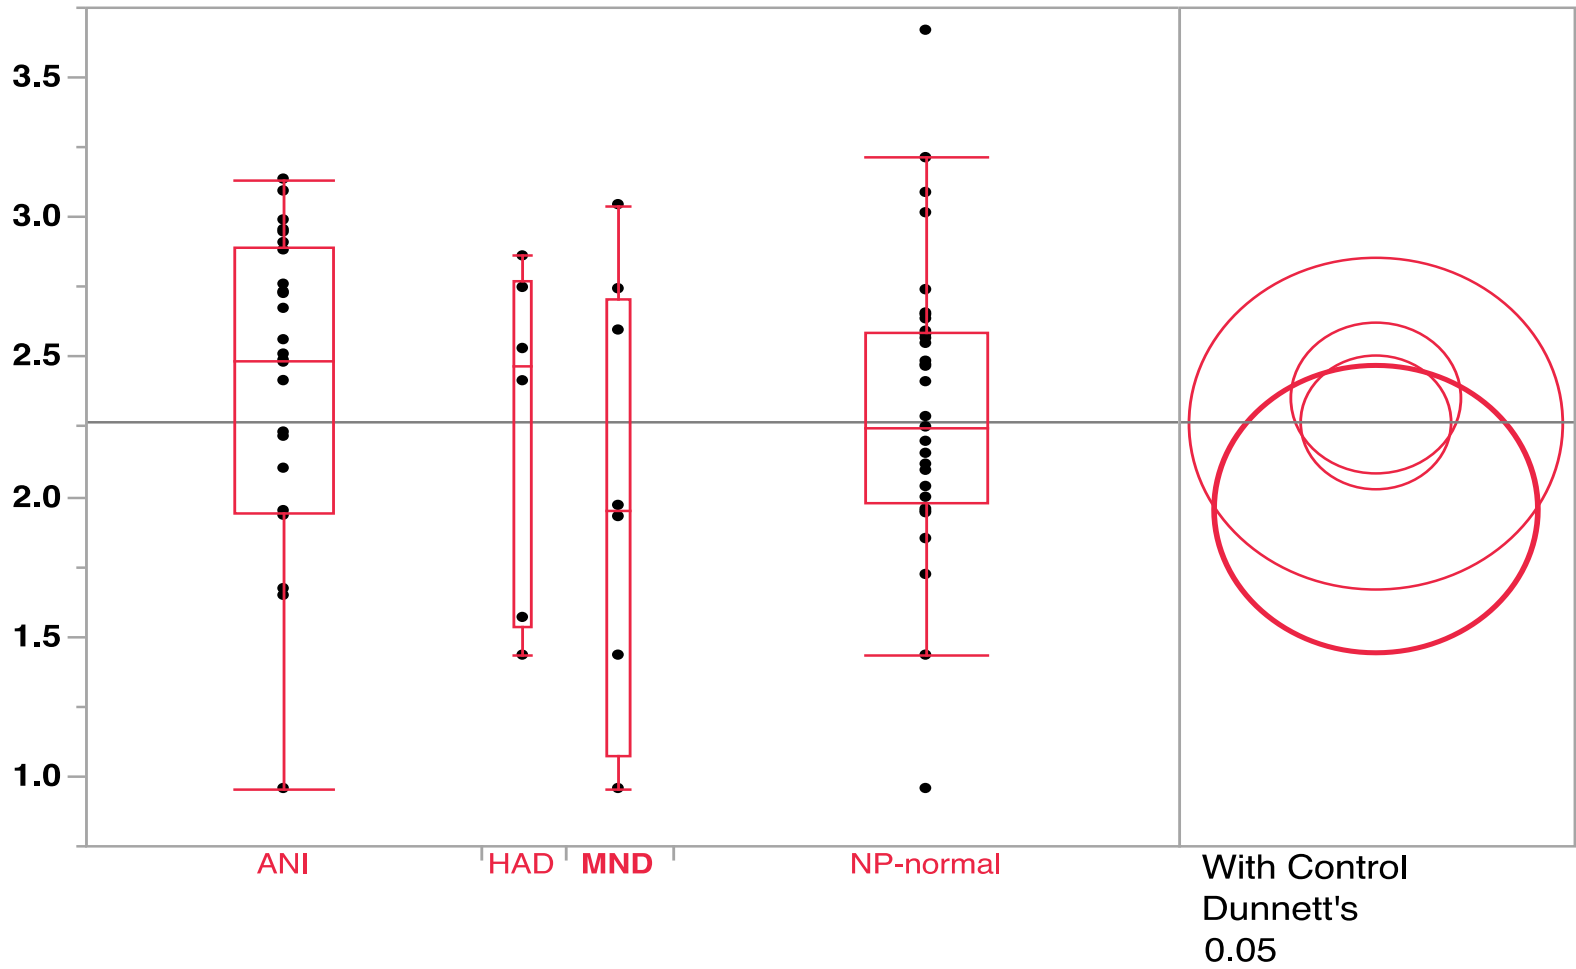

ANOVA F ratio=-0.86; p=.46.

ANI: Asymptomatic Neurocognitive Impairment; MND: Mild Neurocognitive Disorder; HAD: HIV-associated dementia; NP-normal: neuropsychologically normal
